# Supplementary material
Source: HighWire-hosted journal article supplement (https://bmjopen.bmj.com/content/12/8/e062036)
Supplement: inline-supplementary-material-1 [file inline-supplementary-material-1.pdf]

## Pubmed Search Strategy:

((((((("Carcinoma, Non-Small-Cell Lung"[Mesh]) OR (((((((((((Carcinoma, Non Small Cell Lung[Title/Abstract]) OR (Carcinomas, Non-Small-Cell Lung[Title/Abstract])) OR (Lung Carcinoma, Non-Small-Cell[Title/Abstract])) OR (Lung Carcinomas, Non-Small-Cell[Title/Abstract])) OR (Non-Small-Cell Lung Carcinomas[Title/Abstract])) OR (Non-Small-Cell Lung Carcinoma[Title/Abstract])) OR (Non Small Cell Lung Carcinoma[Title/Abstract])) OR (Carcinoma, Non-Small Cell Lung[Title/Abstract])) OR (Non-Small Cell Lung Carcinoma[Title/Abstract])) OR (Non-Small Cell Lung Cancer[Title/Abstract])) OR (Nonsmall Cell Lung Cance[Title/Abstract]))) AND ("Erlotinib Hydrochloride"[Mesh])) OR (((((((((((((((Hydrochloride, Erlotinib[Title/Abstract]) OR (Erlotinib HCl[Title/Abstract])) OR (HCl, Erlotinib[Title/Abstract])) OR (OSI-774[Title/Abstract])) OR (OSI 774[Title/Abstract])) OR (OSI774[Title/Abstract])) OR (CP 358774[Title/Abstract])) OR (358774, CP[Title/Abstract])) OR (CP 358,774[Title/Abstract])) OR (358,774, CP[Title/Abstract])) OR (CP-358,774[Title/Abstract])) OR (CP358,774[Title/Abstract])) OR (CP-358774[Title/Abstract])) OR (CP358774[Title/Abstract])) OR (11C-erlotinib[Title/Abstract])) OR (11C erlotinib[Title/Abstract])) OR (Erlotinib[Title/Abstract])) OR (N-(3-ethynylphenyl)-6,7-bis(2-methoxyethoxy)quinazolin-4-amine[Title/Abstract])) OR (Tarceva[Title/Abstract]))) AND ("Bevacizumab"[Mesh])) OR (((Mvasi[Title/Abstract]) OR (Bevacizumab-awwb[Title/Abstract])) OR (Bevacizumab awwb[Title/Abstract])) OR (Avastin[Title/Abstract]))) AND ( ( randomized controlled trial[Publication Type] OR randomized[Title/Abstract] OR placebo[Title/Abstract] ) ).

## Embase Search Strategy:

'carcinoma, non small cell lung':ab,ti OR ('carcinomas, non-small-cell lung':ab,ti OR 'lung carcinoma, non-small-cell':ab,ti OR 'lung carcinomas, non-small-cell':ab,ti OR 'non-small-cell lung carcinomas':ab,ti OR 'non-small-cell lung carcinoma':ab,ti OR 'non small cell lung carcinoma':ab,ti OR 'carcinoma, non-small cell lung':ab,ti OR 'non-small cell lung carcinoma':ab,ti OR 'non-small cell lung cancer':ab,ti) AND( erlotinib AND hydrochloride OR 'hydrochloride, erlotinib':ab,ti OR 'erlotinib hcl':ab,ti OR 'hcl, erlotinib':ab,ti OR 'osi-774':ab,ti OR 'osi 774':ab,ti OR 'osi774':ab,ti OR 'cp 358774':ab,ti OR '358774, cp':ab,ti OR 'cp 358,774':ab,ti OR '358,774, cp':ab,ti OR 'cp-358,774':ab,ti OR 'cp358,774':ab,ti OR 'cp-358774':ab,ti OR 'cp358774':ab,ti OR '11c-erlotinib':ab,ti OR '11c erlotinib':ab,ti OR 'erlotinib':ab,ti OR 'n-(3-ethynylphenyl)-6,7-bis(2-methoxyethoxy)quinazolin-4-amine':ab,ti OR 'tarceva':ab,ti) AND (bevacizumab OR 'mvasi':ab,ti OR 'bevacizumab-awwb':ab,ti OR 'bevacizumab awwb':ab,ti OR 'avastin':ab,ti) AND ('randomized controlled trial':ab,ti OR 'randomized':ab,ti OR 'placebo':ab,ti OR 'rct':ab,ti).

web of science Search Strategy:

(TS=(Carcinoma, Non-Small-Cell Lung OR Carcinoma, Non Small Cell Lung OR Carcinomas, Non-Small-Cell Lung OR Lung Carcinoma, Non-Small-Cell OR Lung Carcinomas, Non-Small-Cell OR Non-Small-Cell Lung Carcinomas OR Non-Small-Cell Lung Carcinoma OR Non Small Cell Lung Carcinoma OR Carcinoma, Non-Small Cell Lung OR Non-Small Cell Lung Carcinoma OR Non-Small Cell Lung Cancer OR Nonsmall Cell Lung Cance))AND(TS=(Erlotinib Hydrochloride OR Hydrochloride, Erlotinib OR Erlotinib HCl OR HCl, Erlotinib OR OSI-774 OR OSI 774 OR OSI774 OR CP 358774 OR 358774, CP OR CP 358,774 OR 358,774, CP OR CP-358,774 OR CP358,774 OR CP-358774 OR CP358774 OR 11C-erlotinib OR 11C erlotinib OR Erlotinib OR N-(3-ethynylphenyl)-6,7-bis(2-methoxyethoxy)quinazolin-4-amine OR Tarceva))AND(TS=(Bevacizumab OR Mvasi OR Bevacizumab-awwb OR Bevacizumab awwb OR Avastin))AND(TS=(randomized controlled trial OR randomized OR placebo OR RCT)).

Cochrane Library Search Strategy:

((Carcinoma, Non-Small-Cell Lung) OR (Carcinoma, Non Small Cell Lung ):ab,ti,kw OR (Carcinomas, Non-Small-Cell Lung):ab,ti,kw OR (Lung Carcinoma, Non-Small-Cell ):ab,ti,kw OR (Lung Carcinomas, Non-Small-Cell ):ab,ti,kw OR (Non-Small-Cell Lung Carcinomas ):ab,ti,kw OR (Non-Small-Cell Lung Carcinoma ):ab,ti,kw OR (Non Small Cell Lung Carcinoma ):ab,ti,kw OR (Carcinoma, Non-Small Cell Lung ):ab,ti,kw OR (Non-Small Cell Lung Carcinoma ):ab,ti,kw) AND ((Erlotinib Hydrochloride) OR (Hydrochloride, Erlotinib):ab,ti,kw OR (Erlotinib HCl):ab,ti,kw OR (HCl, Erlotinib):ab,ti,kw OR (OSI-774):ab,ti,kw OR (OSI 774):ab,ti,kw OR (OSI774):ab,ti,kw OR (CP 358774):ab,ti,kw OR (358774, CP):ab,ti,kw OR (CP 358,774):ab,ti,kw OR (358,774, CP):ab,ti,kw OR (CP-358,774):ab,ti,kw OR (CP358,774):ab,ti,kw OR (CP-358774):ab,ti,kw OR (CP358774):ab,ti,kw OR (11C-erlotinib):ab,ti,kw OR (11C erlotinib):ab,ti,kw) AND ((Bevacizumab) OR (Mvasi):ab,ti,kw OR (Bevacizumab-awwb):ab,ti,kw OR (Bevacizumab awwb ):ab,ti,kw OR (Avastin):ab,ti,kw) AND ((randomized controlled trial):ab,ti,kw OR (randomized):ab,ti,kw OR (placebo):ab,ti,kw OR (RCT):ab,ti,kw).
